# Supplementary material for: Pachytene piRNAs instruct massive mRNA elimination during late spermiogenesis
Source: PubMed Central journal article supplement — Cell Res. 2014 May 2;24(6):680–700. doi: 10.1038/cr.2014.41 (PMC4042167; doi:10.1038/cr.2014.41), 2014-05-02
Supplement: cr201441x1.pdf [file cr201441x1.pdf]

**Supplementary information, Table 1** Deep sequencing analysis of MIWI RIPed RNAs.

| Libraries          | Small RNAs |        | Long Transcripts |        |
|--------------------|------------|--------|------------------|--------|
| Unique reads       | 715,144    |        | 1,499,244        |        |
| Total reads        | 25,697,817 |        | 19,174,539       |        |
| miRNA              | 74,520     | 0.29%  | 352              | 0.003% |
| ncRNA              | 127,897    | 0.50%  | 272,597          | 2.49%  |
| mRNA               | 749,596    | 2.92%  | 2,269,940        | 20.75% |
| Intron             | 496,710    | 1.93%  | 644,688          | 5.88%  |
| TE                 | 5,273,641  | 20.52% | 7,357,553        | 67.2%  |
| Intergenic regions | 18,975,453 | 73.84% | 410,289          | 3.7%   |
