# Supplementary material for: Pachytene piRNAs instruct massive mRNA elimination during late spermiogenesis
Source: PubMed Central journal article supplement — Cell Res. 2014 May 2;24(6):680–700. doi: 10.1038/cr.2014.41 (PMC4042167; doi:10.1038/cr.2014.41), 2014-05-02
Supplement: cr201441x3.pdf [file cr201441x3.pdf]

**Supplementary information, Table S3** Deep sequencing of MIWI CLIPed RNAs

| MIWI CLIPed tags   | >33 nt reads |       | All reads  |        |
|--------------------|--------------|-------|------------|--------|
| Unique reads       | 5,091,165    |       | 23,928,416 |        |
| miRNA              | 1,165        | 0.02% | 13,788     | 0.06%  |
| ncRNA              | 161,542      | 3.2%  | 409,674    | 1.71%  |
| 5'UTR+CDS+3'UTR    | 856,430      | 16.8% | 2,089,628  | 8.74%  |
| Intron             | 1,399,027    | 27.5% | 4,006,540  | 16.74% |
| TE                 | 1,214,070    | 23.8% | 5,140,664  | 21.48% |
| Intergenic regions | 1,458,928    | 28.7% | 12,268,122 | 51.27% |
