# Supplementary material for: Pachytene piRNAs instruct massive mRNA elimination during late spermiogenesis
Source: PubMed Central journal article supplement — Cell Res. 2014 May 2;24(6):680–700. doi: 10.1038/cr.2014.41 (PMC4042167; doi:10.1038/cr.2014.41), 2014-05-02
Supplement: cr201441x5.pdf [file cr201441x5.pdf]

**Supplementary information, Table S5** Deep sequencing analysis of transcriptome in elongating spermatids

| Libraries          | Small RNAs |        | Long Transcripts |       |
|--------------------|------------|--------|------------------|-------|
| Unique reads       | 1,095,891  |        | 18,574,777       |       |
| Total reads        | 5,983,095  |        | 36,194,541       |       |
| miRNA              | 406,086    | 6.79%  | 13,874           | 0.06% |
| ncRNA              | 20,829     | 0.35%  | 23,895           | 0.11% |
| mRNA               | 228,166    | 3.81%  | 15,809,096       | 71.7% |
| Intron             | 133,520    | 2.23%  | 2,037,927        | 9.25% |
| TE                 | 930,823    | 15.56% | 1,151,068        | 5.23% |
| Intergenic regions | 4,263,671  | 71.26% | 2,989,641        | 13.6% |
