# Supplementary material for: Pachytene piRNAs instruct massive mRNA elimination during late spermiogenesis
Source: PubMed Central journal article supplement — Cell Res. 2014 May 2;24(6):680–700. doi: 10.1038/cr.2014.41 (PMC4042167; doi:10.1038/cr.2014.41), 2014-05-02
Supplement: cr201441x7.pdf [file cr201441x7.pdf]

**Supplementary information, Table S7** Sequences of chemically synthesized oligonucleotides

|                         |                                                                                                                                              |
|-------------------------|----------------------------------------------------------------------------------------------------------------------------------------------|
| piR_010111 (DQ686004)   | 5'-pUUUGUUGAAUGGAUGAAUGGGUGGAUGACm-3'                                                                                                        |
| piR_010111 (Mut)        | 5'-pAAACAACUUUGGAUGAAUGGGUGGAUGACm-3'                                                                                                        |
| piR_013474 (DQ691186)   | 5'-pUGGAUGUGAGAUAGAUAGGAGAAGGAAGUCm-3'                                                                                                       |
| piR_013474 (Mut)        | 5'-pACCUACACAGAUAGAUAGGAGAAGGAAGUCm-3'                                                                                                       |
| piR_027161 (DQ711268)   | 5'-pUCUGCAGGCAGAACACUUGGAUUCCUCUCUm-3'                                                                                                       |
| piR_027161 (Mut)        | 5'-pUGACGUCCCAGAACACUUGGAUUCCUCUCUm-3'                                                                                                       |
| piR_035327 (DQ723085)   | 5'-pUAGACAUGUAGUGAUCCUGAGGCAGGCAm-3'                                                                                                         |
| piR_035327 (Mut)        | 5'-pUUCUGUACUAGUGAUCCUGAGGCAGGCAm-3'                                                                                                         |
| piR_005092 (DQ555049)   | 5'-pUGGGCUGUUUGGCAUUGAAGUGUAGAGCCUm-3'                                                                                                       |
| piR_005092 (Mut)        | 5'-pUCCCGACAUUGGCAUUGAAGUGUAGAGCCUm-3'                                                                                                       |
| piR_12800 (unannotated) | 5'-pUAGGUCUACUGAUGAACAGGGAAGAUAGGAm-3'                                                                                                       |
| piR_12800 (Mut)         | 5'-pUUCCAGAUCUGAUGAACAGGGAAGAUAGGAm-3'                                                                                                       |
| piR_007526 (DQ564235)   | 5'-pUACAAGUGGAUGAUGAUAGAUUGGUGGGCAm-3'                                                                                                       |
| piR_007526 (Mut)        | 5'-pUUGUUCACGAUGAUGAUAGAUUGGUGGGCAm-3'                                                                                                       |
| piR_009524 (DQ685064)   | 5'-pUGAGAUGACGUUGUAGAUGAAAUGGUUAAm-3'                                                                                                        |
| piR_009524 (Mut)        | 5'-pUCUCUACUCGUUGUAGAUGAAAUGGUUAAm-3'                                                                                                        |
| piR_018939 (DQ699277)   | 5'-pUAGAAUGUAGAGAAACUAAGAUGGUGGGUUm-3'                                                                                                       |
| piR_018939 (Mut)        | 5'-pUUCUACAAGAGAAACUAAGAUGGUGGGUUm-3'                                                                                                        |
| <i>Miwi</i> siRNA       | 5'-UACUUCUGUGACCUUGUGC-3'                                                                                                                    |
| <i>Caf1</i> siRNA       | 5'-UCCUCUUCAUAUGCAUUC-3'                                                                                                                     |
| <i>Cnot1</i> siRNA      | 5'-GAUAAAGAAUUACAUAUAA-3'                                                                                                                    |
| <i>Cnot6</i> siRNA      | 5'-UACAACACCAGAGUCUGGC-3'                                                                                                                    |
| <i>Mili</i> siRNA       | 5'-UCUCCUUGACUGUGAUCC-3'                                                                                                                     |
| <i>Ago2</i> siRNA       | 5'-UUUCUCAGGUUUGAUGUCC-3'                                                                                                                    |
| sh <i>Miwi</i>          | sh <i>Miwi</i> -1: 5'-CATGAATTTGCAACAAATT-3'<br>sh <i>Miwi</i> -2: 5'-GACAATATTGTTTTTACCT-3'<br>sh <i>Miwi</i> -3: 5'-GATAAAATGCGCAATGATT-3' |
| sh <i>Caf1</i>          | sh <i>Caf1</i> -1: 5'-AGTTAGAGCTGGAGCGCAT-3'<br>sh <i>Caf1</i> -2: 5'-TGGATGAAGAGATGAAGAA-3'<br>sh <i>Caf1</i> -3: 5'-ACAGAACGGCACAGGGAAT-3' |
| anti-piR_010111         | 5'/Cy3/-GUCAUCCACCCAUUCAUCCAUUCAACAAAm-3'                                                                                                    |
| anti-piR_013474         | 5'/Cy3/-GACUCCUUCUCCUAUCUAUCUCACAUCCAm-3'                                                                                                    |

|                                          |                                                                                                                                                                                                                                                                                                                                                                                                                                                                                                                                                                   |
|------------------------------------------|-------------------------------------------------------------------------------------------------------------------------------------------------------------------------------------------------------------------------------------------------------------------------------------------------------------------------------------------------------------------------------------------------------------------------------------------------------------------------------------------------------------------------------------------------------------------|
| Message-specific primer for<br>PAT assay | <i>Grk4</i> : 5'-GGTGTCATTGTCTCAGTCAAACAGG-3'<br><i>Sox6</i> : 5'-AGGTACCTACGTGGCCCATGGCTGG-3'<br><i>Zkscan17</i> : 5'-AGGCAGCCAGTGGGCTGTAACGGCT-3'<br><i>Cacna1h</i> : 5'-CACCAAGGAGTACTGGCCCATGCAA-3'<br><i>Cnot1</i> : 5'-GTTCCGTGAACAGCTAGGCCCGTGT-3'<br><i>Nploc4</i> : 5'-GCTGGGCATAGTGGTCTGTGCCT-3'<br><i>Samd4</i> : 5'-GCTCTACTGATGCAGATACACT-3'<br><i>Qrich1</i> : 5'-GCTCAGACATAAACTTAACATC-3'<br><i>Tcf20</i> : 5'-CCCTTGTGGGGACCCACAGCATCCATGG-3'<br><i>Ap2a1</i> : 5'-GCGCCTGGGAGCTCCCTCTGGCCTT-3'<br><i>GAPDH</i> : 5'-AGGGTGGTGGACCTCATGGCCTAC-3' |
|------------------------------------------|-------------------------------------------------------------------------------------------------------------------------------------------------------------------------------------------------------------------------------------------------------------------------------------------------------------------------------------------------------------------------------------------------------------------------------------------------------------------------------------------------------------------------------------------------------------------|
