# Supplementary material for: Pachytene piRNAs instruct massive mRNA elimination during late spermiogenesis
Source: PubMed Central journal article supplement — Cell Res. 2014 May 2;24(6):680–700. doi: 10.1038/cr.2014.41 (PMC4042167; doi:10.1038/cr.2014.41), 2014-05-02
Supplement: cr201441x8.pdf [file cr201441x8.pdf]

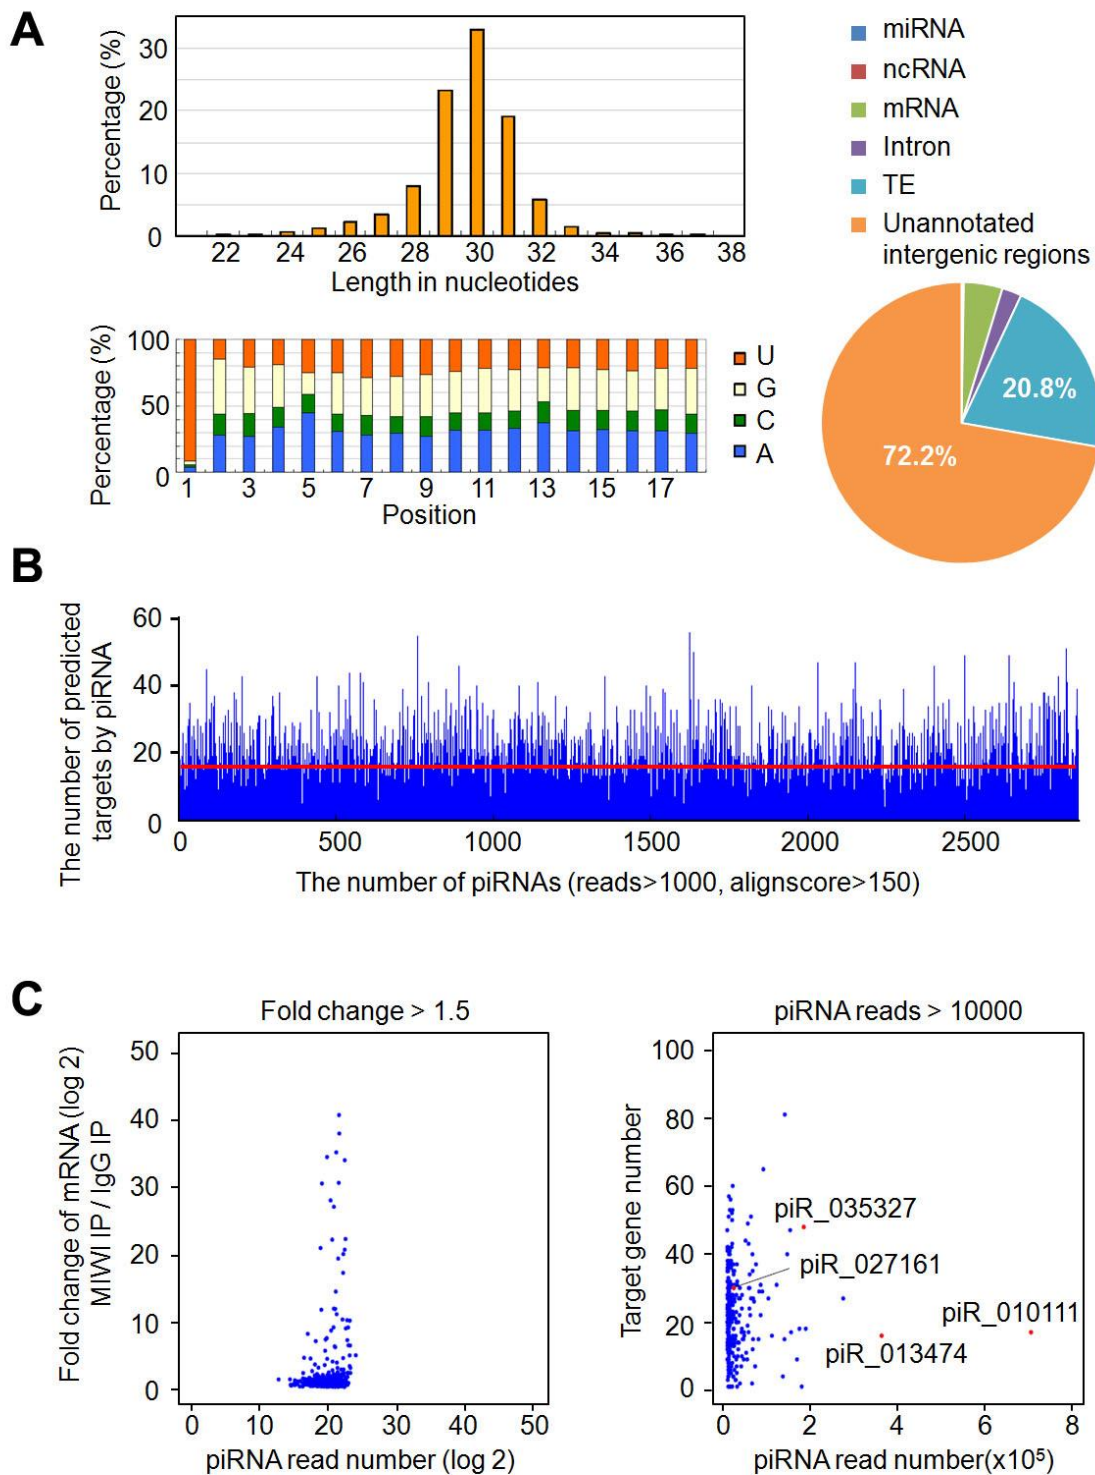

**Supplementary information, Figure S1 Prediction of piRNA targets by computational approaches.**

**(A)** MIWI associated small RNAs in elongating spermatids. Top, size distribution for MIWI-associated small RNAs. Middle, nucleotide distribution for MIWI-associated small RNAs. Right, Genome annotation for MIWI-associated small RNAs.

**(B)** The number of predicted targets for each MIWI-associated piRNA with reads  $\geq 1,000$ . X axis shows individual MIWI-associated 2861 piRNAs containing in predicted mRNA:piRNA interactions. Y axis represents the predicted target numbers for each MIWI-associated piRNA, with miRanda

alignscore >150.

(C) Distributions of filtered piRNA target genes. Left, the plots were distributions of mRNAs with fold-change > 1.5 and FDR<0.05 in anti-MIWI RIP relative to IgG RIP (Y axis), against the read number (log2) for piRNAs that were predicted to target the mRNAs (X axis). Right, X axis shows the reads of piRNAs, while Y axis represents the targets numbers for cognate piRNAs. Four piRNAs that were confirmed to regulate their targets by reporter assays were indicated in red.
