# Supplementary material for: Pachytene piRNAs instruct massive mRNA elimination during late spermiogenesis
Source: PubMed Central journal article supplement — Cell Res. 2014 May 2;24(6):680–700. doi: 10.1038/cr.2014.41 (PMC4042167; doi:10.1038/cr.2014.41), 2014-05-02
Supplement: cr201441x15.pdf [file cr201441x15.pdf]

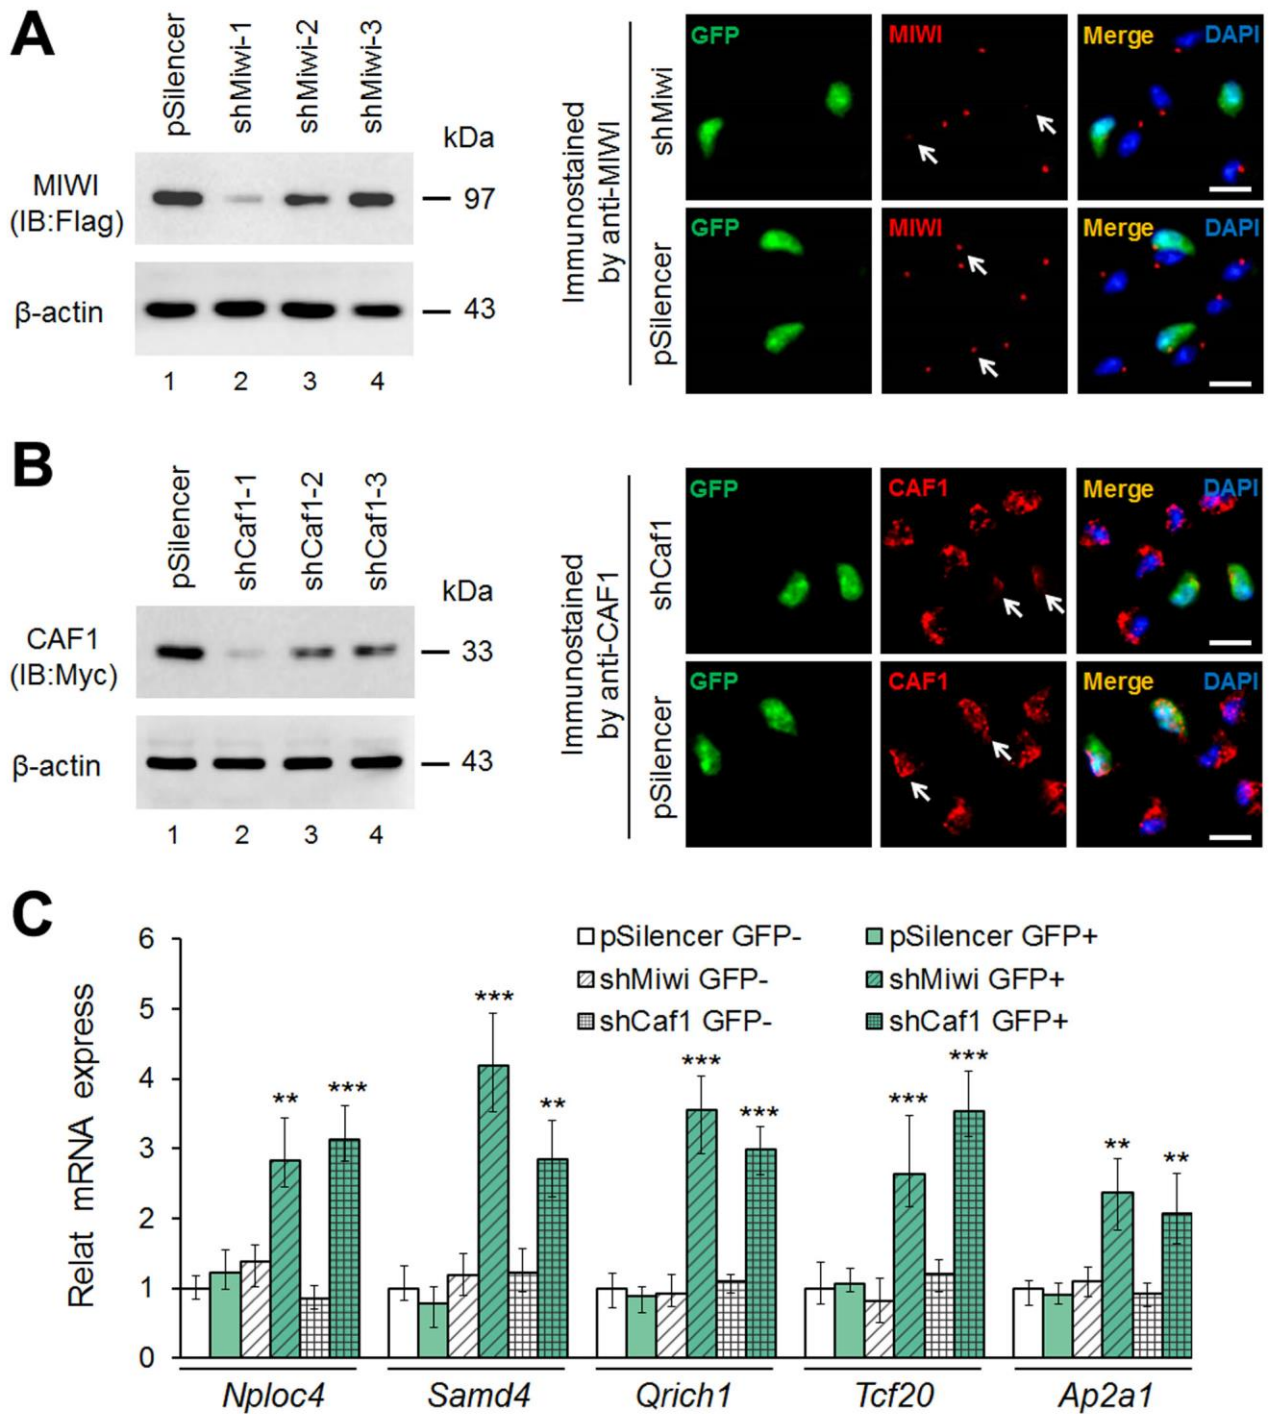

**Supplementary information, Figure S8** shRNA knockdown of mouse testicular *Miwi* or *Caf1* by testis lentivirus transduction.

**(A)** Knockdown of *Miwi* by lentivirus-expressed shRNAs. Left, western blot analysis of the efficiencies of *Miwi* shRNA constructs in silencing of transiently expressed Flag-MIWI in 293T cells. Right, immunostaining of elongating spermatids from testes transduced by *shMiwi*:GFP or control pSilencer:GFP with anti-MIWI antibody.

**(B)** Knockdown of *Caf1* by lentivirus-expressed shRNAs. Left, western blot analysis of the efficiencies of *Caf1* shRNA constructs in silencing of transiently expressed Myc-CAF1 in 293T cells. Right, immunostaining of elongating spermatids from testes transduced by *shCaf1*:GFP or control pSilencer:GFP with anti-CAF1 antibody.

(C) Knockdown of *Miwi* or *Caf1* led to up-regulation of non-responsive candidate targets in elongating spermatids. GFP<sup>+</sup> cells were sorted from the elongating spermatids isolated from testes transduced by *shMiwi*:GFP, *shCaf1*:GFP, or control pSilencer:GFP. qRT-PCR assays were performed to determine the expression of 5 non-responsive candidates, including *Nploc4*, *Samd4*, *Qrich1*, *Tcf20*, and *Ap2a1* in GFP<sup>+</sup> cells and respective GFP<sup>-</sup> cells, with *GAPDH* served as an internal control. The respective treatments indicated in parentheses.
