# Supplementary material for: Pachytene piRNAs instruct massive mRNA elimination during late spermiogenesis
Source: PubMed Central journal article supplement — Cell Res. 2014 May 2;24(6):680–700. doi: 10.1038/cr.2014.41 (PMC4042167; doi:10.1038/cr.2014.41), 2014-05-02
Supplement: cr201441x16.pdf [file cr201441x16.pdf]

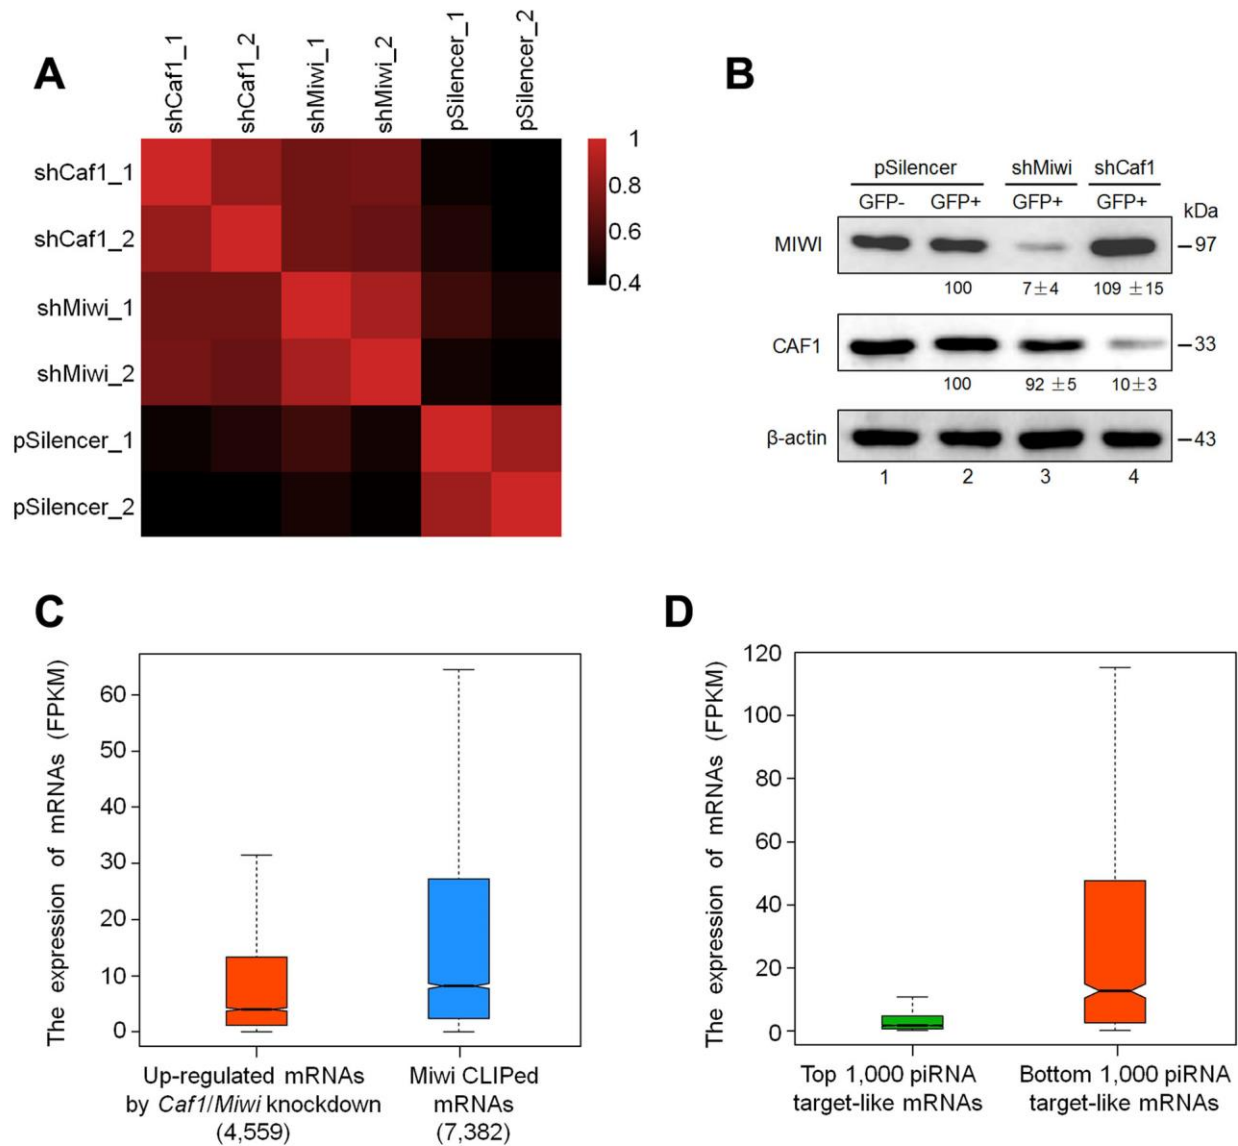

**Supplementary information, Figure S9** Systematic analyses of piRNA targets in elongating spermatids.

(A) Replication of transcriptome microarray assays.

(B) Western blot assays of the levels of MIWI and CAF1 proteins in GFP<sup>+</sup> elongating spermatids transduced by pSilencer:GFP (lane 2), *shMiwi*:GFP (lane 3), or *shCaf1*:GFP (lane 4). The GFP<sup>-</sup> cells (lane 1) were collected as the control. β-actin served as an internal reference.

(C) The average expression for the 4,599 MIWI/CAF1-coregulated mRNAs vs 7,382 MIWI CLIPed mRNAs in elongating spermatids.

(D) The average expression for the 1,000 top piRNA target-like mRNAs vs 1,000 bottom piRNA target-like mRNAs in elongating spermatids.
