# Supplementary material for: Pachytene piRNAs instruct massive mRNA elimination during late spermiogenesis
Source: PubMed Central journal article supplement — Cell Res. 2014 May 2;24(6):680–700. doi: 10.1038/cr.2014.41 (PMC4042167; doi:10.1038/cr.2014.41), 2014-05-02
Supplement: cr201441x17.pdf [file cr201441x17.pdf]

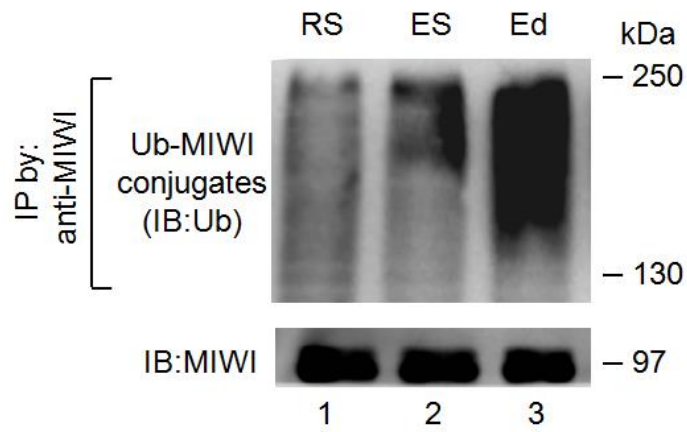

**Supplementary information, Figure S10** Detection of MIWI ubiquitination in isolated mouse male germ cells.

MIWI ubiquitination in round spermatids (RS, lane 1), elongating spermatids (ES, lane 2), and elongated spermatids (Ed, lane 3). The anti-MIWI IP pellets immunoblotted with anti-Ub for Ub-MIWI conjugates (top) or anti-MIWI to normalize the loading amounts (bottom).
